# Supplementary material for: Hybridization of Au nanoparticle-loaded TiO2 with BN nanosheets for efficient solar-driven photocatalysis
Source: Royal Society of Chemistry journal article supplement (doi:10.1039/c3ta13769d), 2013-12-17
Supplement: c3ta13769d.pdf [file c3ta13769d.pdf]

**Electronic Supplementary Information (ESI) for:**

**Hybridization of Au nanoparticle-loaded TiO<sub>2</sub> with BN nanosheets for efficient solar-driven photocatalysis**

Yusuke Ide,<sup>a,\*</sup> Fei Liu,<sup>a,b</sup> Jun Zhang,<sup>a</sup> Naoyuki Kawamoto,<sup>a</sup> Kenji Komaguchi,<sup>c</sup> Yoshio Bando<sup>a</sup> and Dmitri Golberg<sup>a</sup>

<sup>a</sup> World Premier International (WPI) Research Center, International Center for Materials Nanoarchitectonics (MANA), National Institute for Materials Science (NIMS), 1-1 Namiki, Tsukuba 305-0044, Japan.

<sup>b</sup> State Key Laboratory of Optoelectronic Materials and Technologies, Guangdong Province Key Laboratory of Display Material and Technology, and School of Physics and Engineering, Sun Yat-sen University, Guangzhou 510275 (PR China).

<sup>c</sup> Graduate School of Engineering, Department of Applied Chemistry, Hiroshima University, 1-4-1 Kagamiyama, Higashi-Hiroshima 739-8527, Japan.

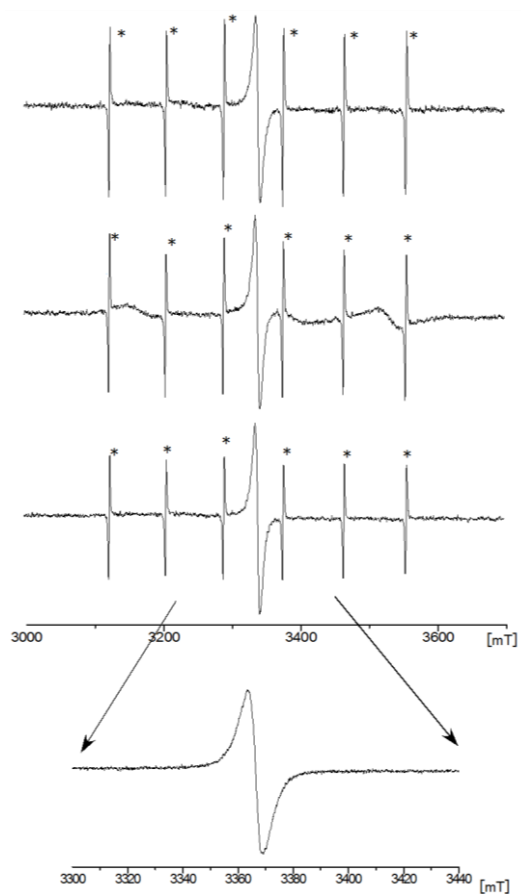

**Fig. S1** ESR spectra of Au/TiO<sub>2</sub>/BN. Au/TiO<sub>2</sub>/BN were treated evacuated at 423 K (top), treated with O<sub>2</sub> at room temperature (middle), and finally irradiated by visible light (bottom). The all neasurements were done at 77 K. Inset shows the expanded figure of the bottom panel.
